# Supplementary material for: SAR202 Genomes from the Dark Ocean Predict Pathways for the Oxidation of Recalcitrant Dissolved Organic Matter
Source: PubMed Central journal article supplement (PMC5395668; doi:10.1128/mbio.00413-17), 2017-04-18

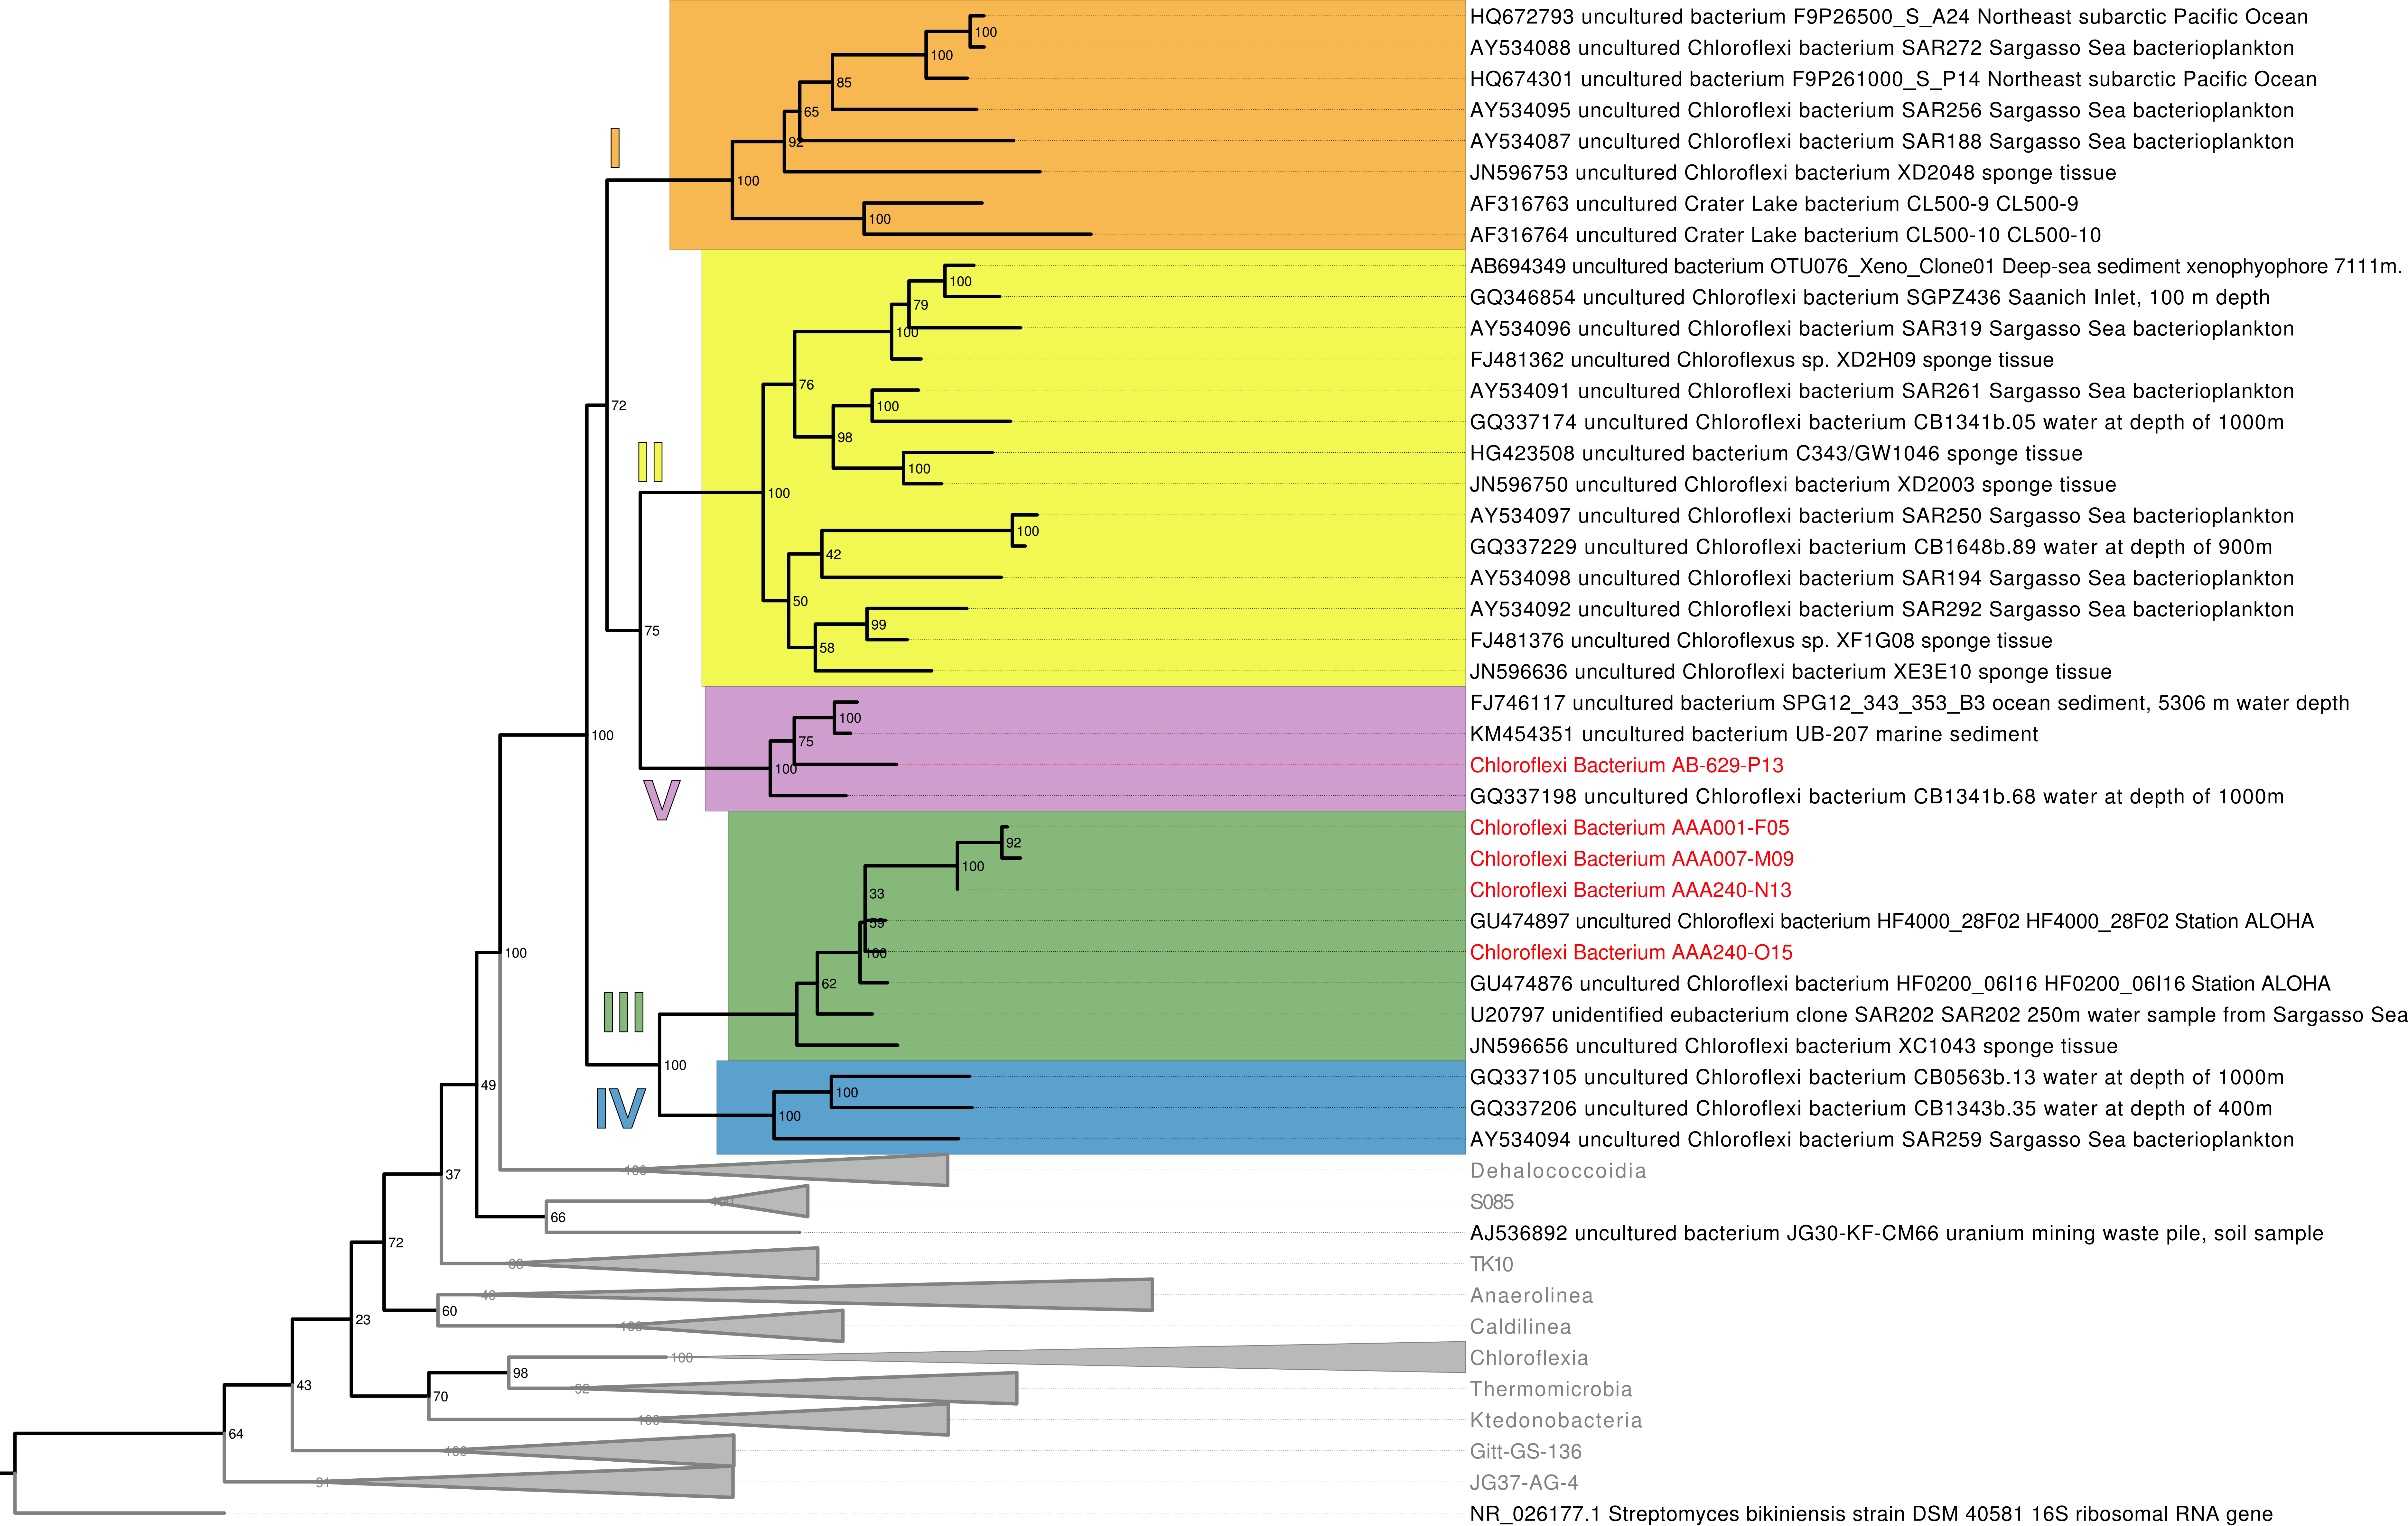

Supplement: mbo002173270sf1.pdf [file mbo002173270sf1.pdf]
