# Supplementary material for: SAR202 Genomes from the Dark Ocean Predict Pathways for the Oxidation of Recalcitrant Dissolved Organic Matter
Source: PubMed Central journal article supplement (PMC5395668; doi:10.1128/mbio.00413-17), 2017-04-18

sar202\_aaa240-o15

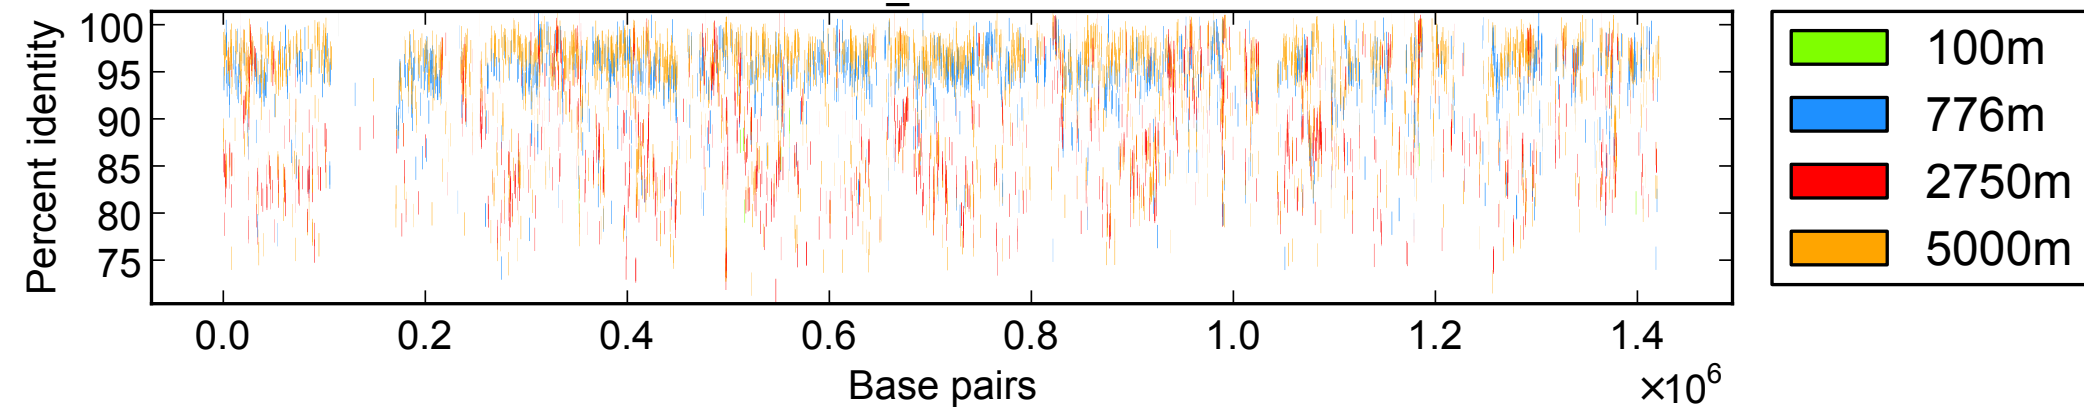

sar202\_aaa240-n13

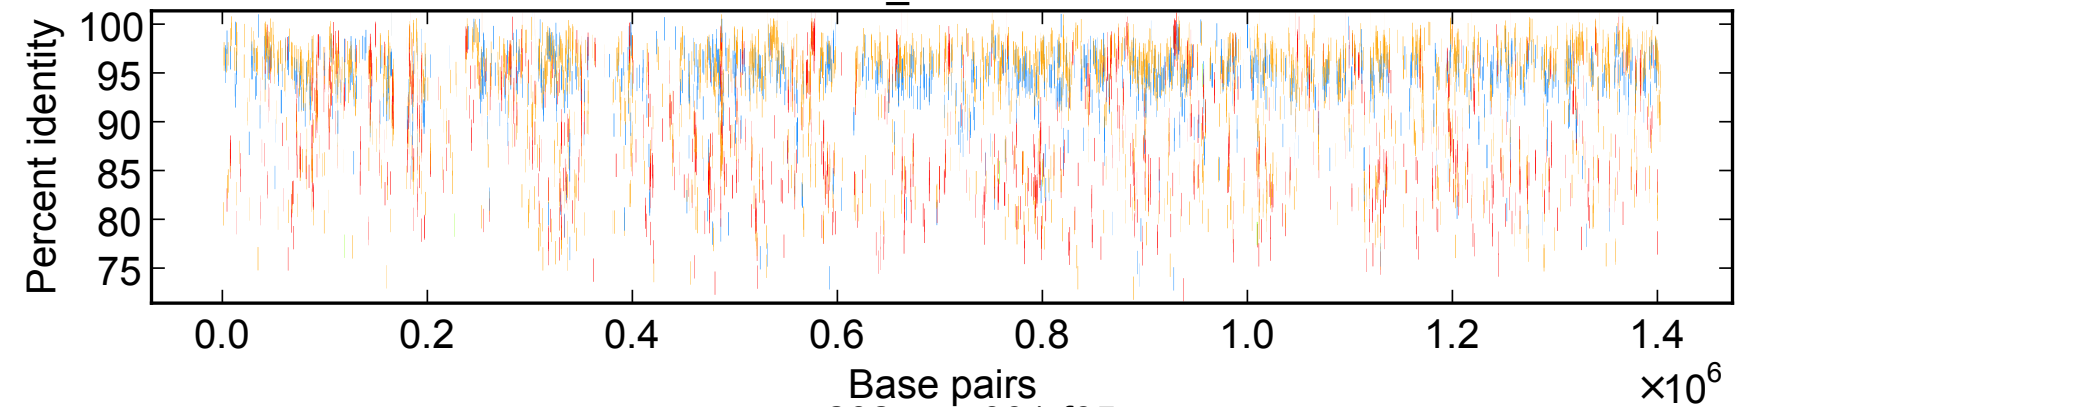

sar202\_aaa001-f05

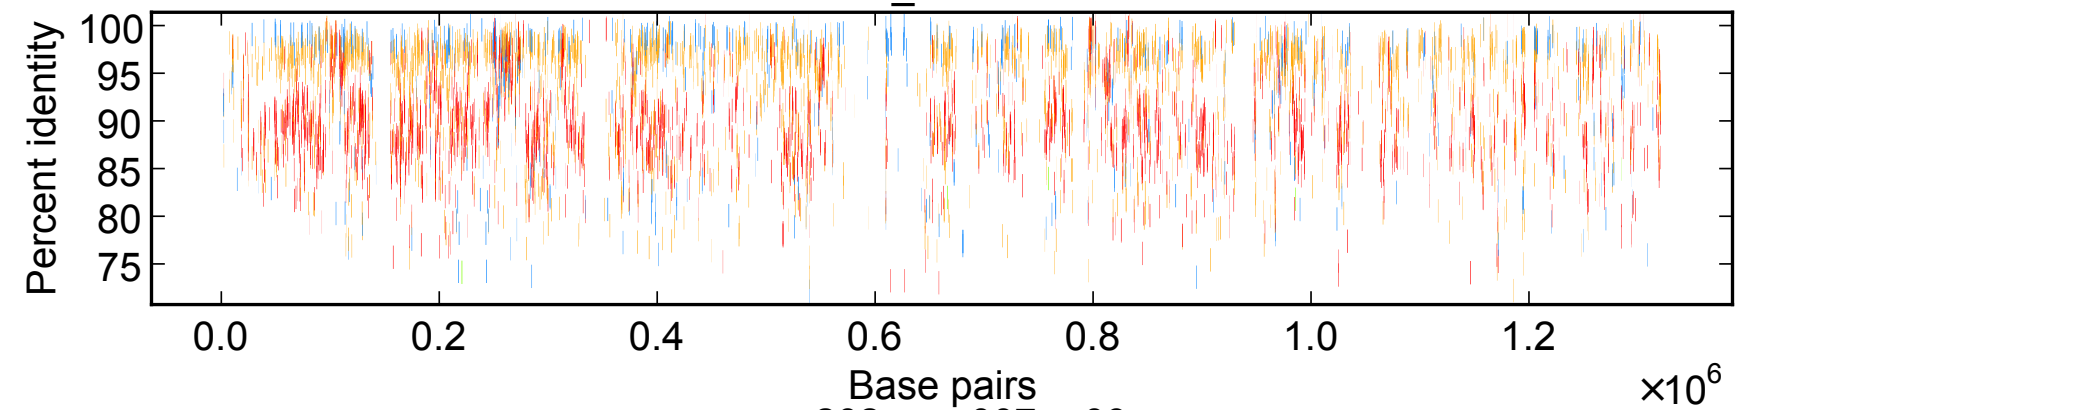

sar202\_aaa007-m09

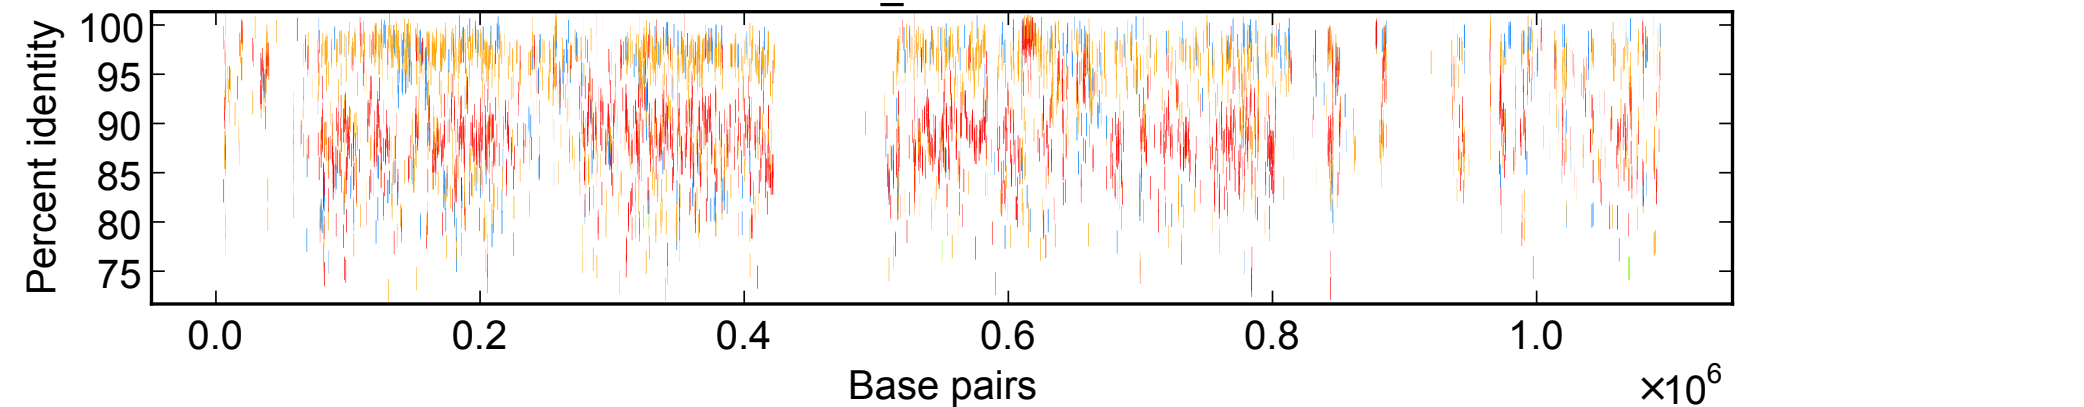

sar202\_ab-629-p13

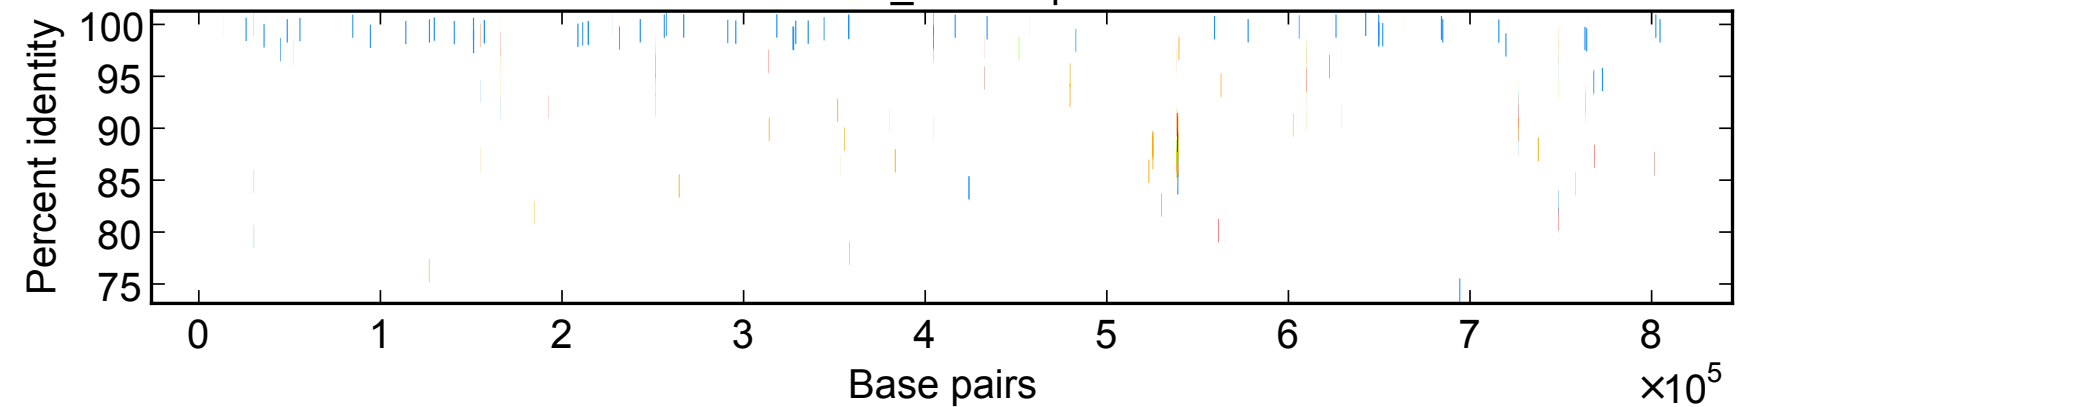

Supplement: mbo002173270sf4.pdf [file mbo002173270sf4.pdf]
