# Supplementary material for: SAR202 Genomes from the Dark Ocean Predict Pathways for the Oxidation of Recalcitrant Dissolved Organic Matter
Source: PubMed Central journal article supplement (PMC5395668; doi:10.1128/mbio.00413-17), 2017-04-18
Supplement: mbo002173270st1.pdf [file mbo002173270st1.pdf]

Table S1.) Assembly statistics for 5 SAR202 single-amplified genomes (SAGs). Crossover point (Cp) represent the number of hours into the MDA reaction where the product reached half of its maximum dsDNA fluorescence. Only contigs larger than 2000 bp were used in our analyses.

| <b>Assembly Name</b> | <b>Group</b> | <b>No. of Contigs</b> | <b>Total Base Pairs</b> | <b>N50 of Contigs Over 2000 bp</b> | <b>Number of Contigs Larger than N50(2000)</b> | <b>% GC</b> | <b>Cp value</b> | <b>Potential Contamination (CheckM)</b> | <b>Estimated Percent Complete (CheckM)</b> | <b>IMG Accession Number</b> |
|----------------------|--------------|-----------------------|-------------------------|------------------------------------|------------------------------------------------|-------------|-----------------|-----------------------------------------|--------------------------------------------|-----------------------------|
| AAA240-O15           | 3            | 93                    | 1,423,799               | 30,063                             | 13/93                                          | 55          | 13.3            | 0.0                                     | 27.72                                      | 2521172610                  |
| AAA240-N13           | 3            | 181                   | 1,403,147               | 13,072                             | 28/181                                         | 55          | 13.7            | 0.0                                     | 24.82                                      | 2263328036                  |
| AAA001-F05           | 3            | 133                   | 1,320,825               | 14,363                             | 24/133                                         | 55          | 14.1            | 0.0                                     | 14.91                                      | 2521172608                  |
| AAA007-M09           | 3            | 70                    | 1,096,525               | 65,612                             | 5/70                                           | 55          | 0.0             | 0.2                                     | 4.17                                       | 2521172609                  |
| AB-629-P13           | 5            | 39                    | 807,656                 | 37,321                             | 7/39                                           | 41          | 6.2             | 2.5                                     | 2.48                                       | 2639762710                  |
