# Supplementary material for: SAR202 Genomes from the Dark Ocean Predict Pathways for the Oxidation of Recalcitrant Dissolved Organic Matter
Source: PubMed Central journal article supplement (PMC5395668; doi:10.1128/mbio.00413-17), 2017-04-18
Supplement: mbo002173270st3.pdf [file mbo002173270st3.pdf]

Table S3.) Candidate protein sequences found within the SAR202 genomes that potentially code for enzymes or enzyme subunits required by the 3-hydroxypropionate cycle.

| Enzyme                                                       | Candidate Genes                                                                                                                                                                                                                                 |
|--------------------------------------------------------------|-------------------------------------------------------------------------------------------------------------------------------------------------------------------------------------------------------------------------------------------------|
| Acetyl-CoA carboxylase                                       | AAA001-F05: 2521610627, 252161026;<br>AAA007-M09: 2521610950, 2521610951, 2521610952;<br>AAA240-N13: 2264260413, 2264260414, 2521610626, 2264260258, 22664260259;<br>AAA240-O15: 2521612691, 2521612692;<br>AB-629-P13: 2521613197, 2264872648; |
| Malonyl-CoA reductase                                        |                                                                                                                                                                                                                                                 |
| Propionyl-CoA synthase                                       | AAA001-F05: 2521609775, 2521609932, 2521610279, 2521609568;<br>AAA007-M09: 2521611297, 2521610732;<br>AAA240-N13: 2264260782, 2264261023, 2264260846, 2264260825, 2264260914;<br>AAA240-O15: 2521613155;<br>AB-629-P13: 2264873038              |
| Propionyl-CoA carboxylase                                    | AAA001-F05: 2521610627, 252161026;<br>AAA007-M09: 2521610950, 2521610951, 2521610952;<br>AAA240-N13: 2264260413, 2264260414, 2521610626, 2264260258, 22664260259;<br>AAA240-O15: 2521612691, 2521612692;<br>AB-629-P13: 2521613197, 2264872648; |
| Methylmalonyl-CoA epimerase                                  | AAA001-F05: 2521610355;<br>AAA240-N13: 2264260289,<br>AAA240-O15: 2521612297,2521612379                                                                                                                                                         |
| Methylmalonyl-CoA mutase                                     | AAA240-N13: 2264260840, 226426935;<br>AAA240-O15: 2521612298, 2521612295                                                                                                                                                                        |
| Succinyl-CoA:malate-CoA transferase                          | AAA001-F05: 2521610523;<br>AAA007-M09: 2521610725, 252160772;<br>AAA240-N13: 2264260060;<br>AAA240-O15: 2521612823, 2521612284;<br>AB-629-P13: 2264872365, 2264872881                                                                           |
| Succinate dehydrogenase                                      | AAA001-F05: 2521610375                                                                                                                                                                                                                          |
| Fumarate hydratase                                           | AAA240-O15: 2521612857;<br>AB-629-P13: 2264873103;                                                                                                                                                                                              |
| Malyl-CoA/methylmalyl-CoA/citramalyl-CoA trifunctional lyase | AAA007-M09: 2521610711, 2521610713, 2521610712                                                                                                                                                                                                  |
| Methylmalyl-CoA dehydratase                                  |                                                                                                                                                                                                                                                 |
| Mesaconyl-CoA CoA transferase                                |                                                                                                                                                                                                                                                 |
| Mesaconyl-CoA hydratase                                      | AAA001-F05: 2521609939, 2521609938;<br>AAA240-N13: 2264260672                                                                                                                                                                                   |
